# Supplementary material
Source: Springer Nature journal article supplement (https://www.springermedizin.de/resource/supplementary/12891_2013_1684_MOESM3_ESM.pdf/9509120)
Supplement: MOESM3 [file 9509120]

Behavioural exercise therapy (BET) 15 sessions, closed group

| sessions/<br>module    | 1                                                                                                                                                          | 2                                                                                                       | 3                                                                                                       | 4                                                                              | 5                                                                            | 6                                                                 | 7                                                                                           | 8                                                                                                     | 9                                                                                                                  | 10                                                     | 11                                                                   | 12                                                                                  | 13                                                                      | 14                                                         | 15                                                           |                                               |
|------------------------|------------------------------------------------------------------------------------------------------------------------------------------------------------|---------------------------------------------------------------------------------------------------------|---------------------------------------------------------------------------------------------------------|--------------------------------------------------------------------------------|------------------------------------------------------------------------------|-------------------------------------------------------------------|---------------------------------------------------------------------------------------------|-------------------------------------------------------------------------------------------------------|--------------------------------------------------------------------------------------------------------------------|--------------------------------------------------------|----------------------------------------------------------------------|-------------------------------------------------------------------------------------|-------------------------------------------------------------------------|------------------------------------------------------------|--------------------------------------------------------------|-----------------------------------------------|
| BET closed group 60min | introduction VBT                                                                                                                                           | introduction/review                                                                                     | introduction/review                                                                                     | introduction/review                                                            | introduction/review                                                          | introduction/review                                               | introduction/review                                                                         | introduction/review                                                                                   | introduction/review                                                                                                | introduction/review                                    | introduction/review                                                  | introduction/review                                                                 | introduction/review                                                     | introduction/review                                        | introduction/review                                          |                                               |
|                        | activity play - get to know each other                                                                                                                     | activity play - get to know each other                                                                  | activity play - get to know each other                                                                  | activity play - positive exercise experiences                                  | activity play - positive exercise experiences                                | activity play - positive exercise experiences                     | activity play - positive exercise experiences                                               | activity play - positive exercise experiences                                                         | activity play - positive exercise experiences                                                                      | activity play - positive exercise experiences          | activity play - positive exercise experiences                        | activity play - positive exercise experiences                                       | activity play - positive exercise experiences                           | activity play - positive exercise experiences              | activity play - positive exercise experiences                | activity play - positive exercise experiences |
|                        | What is low back pain (lbp)? prevalence and course (acute, subacute, chronic lbp)                                                                          | Why persists my lbp? lack of causes, possibilities and limitations of diagnostic procedures             | the spine as a fascinating and strong system                                                            | effects of physical activity on the organism: „Exercise is good for your body“ | effects of physical activity on mood and well-being, stress, mood management | „coper, fear-avoider, endure“ - strengthening pain defense system | physical activity/ exercise as pleasure                                                     | education: muscularly stabilization of the spine: How does it work?                                   | education: repetition muscularly stabilization and use of muscularly stabilization during activities of daily life | physical activity in everyday life                     | repetition: lumbar stabilization exercises during everyday movements | behavior during recurring pain episodes "flare ups"; repetition avoider and endurer | action planning for home: "activity goals and when-where-and how plans" | coping planning for home "barriers and barrier management" | information about aftercare, support in contacting providers |                                               |
|                        | "exercise break" - swinging gymnastics                                                                                                                     | "exercise break" - swinging gymnastics                                                                  | body awareness exercise „human pendulum“                                                                | active play ("ball transportation")                                            | "exercise break" - swinging gymnastics                                       | activity play - positive exercise experiences                     | introduction of lumbar stabilization exercises: activation of deep and global trunk muscles | lumbar stabilization exercises: activation of deep and global trunk muscles during everyday movements | education: stabilization during work related physical activities                                                   | self-directed functional gymnastics (standard program) | one sided loads and compensation strategies                          | alternative exercises "Qi Gong"                                                     |                                                                         |                                                            | alternative exercises "Qi Gong"                              | final discussion and "take home messages"     |
|                        | What are risk factors for lbp? causes and risk factors                                                                                                     | Why persists my back pain? consequences of pain, pain memory and positive effects of exercise           | self-directed functional gymnastics - introduction of further exercises and training control strategies | dealing with lbp: passive and active self-management strategies                | effects of physical activity on the relationship between pain and mood       | self-directed functional gymnastics (standard program)            | thoughts, moods and posture (photo story)                                                   | self-directed functional gymnastics (standard program)                                                | variation of the body awareness exercise „human pendulum“                                                          | one sided loads and compensation strategies            | alternative exercises "Qi Gong"                                      | alternative exercises "Qi Gong"                                                     | alternative exercises "Qi Gong"                                         | alternative exercises "Qi Gong"                            | conclusion and metaphorical story "Also has all been done?"  |                                               |
|                        | one sided loads versus exercise                                                                                                                            | self-directed functional gymnastics - introduction of further exercises and training control strategies | metaphorical story "mushroom picker"                                                                    | self-directed functional gymnastics (standard program)                         | self-directed functional gymnastics (standard program)                       | relaxation                                                        | self-directed functional gymnastics (standard program)                                      | relaxation                                                                                            | self-directed functional gymnastics (standard program)                                                             | alternative exercises "Qi Gong"                        | alternative exercises "Qi Gong"                                      | conclusion                                                                          | conclusion                                                              | conclusion                                                 | conclusion                                                   |                                               |
|                        | self-directed functional gymnastics (strengthening and stretching exercises) introduction of 2 exercises and training control strategies                   | relaxation "Swedish short relaxation"                                                                   | self-directed functional gymnastics (standard program)                                                  | relaxation                                                                     | relaxation                                                                   | relaxation                                                        | relaxation                                                                                  | relaxation                                                                                            | relaxation                                                                                                         | relaxation                                             | relaxation                                                           | relaxation                                                                          | relaxation                                                              | relaxation                                                 | relaxation                                                   | relaxation                                    |
|                        | conclusion                                                                                                                                                 | conclusion and metaphorical story "Hiking"                                                              | conclusion                                                                                              | conclusion                                                                     | conclusion                                                                   | conclusion                                                        | conclusion                                                                                  | conclusion                                                                                            | conclusion                                                                                                         | conclusion                                             | conclusion                                                           | conclusion                                                                          | conclusion                                                              | conclusion                                                 | conclusion                                                   | conclusion                                    |
|                        | education about low back pain<br>exercise/ training/ relaxation<br>coping with low back pain<br>education about effects of physical activity and exercises |                                                                                                         |                                                                                                         |                                                                                |                                                                              |                                                                   |                                                                                             |                                                                                                       |                                                                                                                    |                                                        |                                                                      |                                                                                     |                                                                         |                                                            |                                                              |                                               |
